# Supplementary material for: Polymorphisms of Killer Ig-like Receptors and the Risk of Glioblastoma
Source: MDPI journal article supplement (doi:10.3390/jcm12144780), 2023-07-19
Supplement: s1 [file s1]

**Supplementary Table S1. Distribution of the 2DL5, 2DS4, and 3DP1 gene subtypes between the GB and control groups.**

| Subtype     | GB (N=77) |        | Control (N=200) |        | P-value | Odds ratio (95% CI) |
|-------------|-----------|--------|-----------------|--------|---------|---------------------|
|             | n (%)     |        | n (%)           |        |         |                     |
| <b>2DL5</b> |           |        |                 |        |         |                     |
| AA          | 22        | (73.3) | 60              | (81.1) | 0.816   |                     |
| <b>BB</b>   | 7         | (23.3) | 5               | (6.8)  | 0.023   | 4.20 (1.21-14.53)   |
| AB          | 1         | (3.3)  | 9               | (12.2) | 0.293   |                     |
| <b>2DS4</b> |           |        |                 |        |         |                     |
| Del/Del     | 13        | (7.3)  | 37              | (20.2) | 0.754   |                     |
| Full/Full   | 37        | (49.3) | 95              | (51.9) | 0.934   |                     |
| Del/Full    | 25        | (33.3) | 51              | (27.9) | 0.244   |                     |
| <b>3DP1</b> |           |        |                 |        |         |                     |
| Del/Del     | 65        | (84.4) | 181             | (90.5) | 0.150   |                     |
| Full/Full   | 0         | (0.0)  | 0               | (0.0)  | > 0.999 | -                   |
| Del/Full    | 12        | (15.6) | 19              | (9.5)  | 0.150   |                     |

**Supplementary Table S2. Distribution of the HLA-A-type genes between the GB and control groups.**

| Group | Alleles | GB (N=77) |        | Control (N=200) |        | <i>P</i> value | Odds ratio<br>(95% CI) |
|-------|---------|-----------|--------|-----------------|--------|----------------|------------------------|
|       |         | n (%)     | n (%)  | n (%)           | n (%)  |                |                        |
| A1    | 01:01   | 5         | (6.5)  | 5               | (2.5)  | 0.110          | -                      |
| A2    | 02:01   | 23        | (29.9) | 73              | (36.5) | 0.299          | -                      |
|       | 02:06   | 15        | (19.5) | 35              | (17.5) | 0.701          | -                      |
|       | 02:06   | 15        | (19.5) | 35              | (17.5) | 0.701          | -                      |
|       | 02:07   | 7         | (9.1)  | 16              | (8.0)  | 0.768          | -                      |
| A203  | 02:03   | 2         | (2.6)  | 7               | (3.5)  | 0.704          | -                      |
| A3    | 03:01   | 4         | (5.2)  | 7               | (3.5)  | 0.518          | -                      |
| A11   | 11:01   | 19        | (24.7) | 42              | (21.0) | 0.508          | -                      |
| A24   | 24:02   | 28        | (36.4) | 75              | (37.5) | 0.861          | -                      |
| A26   | 26:01   | 5         | (6.5)  | 12              | (6.0)  | 0.878          | -                      |
|       | 26:02   | 2         | (2.6)  | 18              | (9.0)  | 0.065          | -                      |
|       | 26:03   | 2         | (2.6)  | 1               | (0.5)  | 0.131          | -                      |
| A29   | 29:01   | 2         | (2.6)  | 1               | (0.5)  | 0.131          | -                      |
| A30   | 30:01   | 7         | (9.1)  | 12              | (6.0)  | 0.362          | -                      |
| A31   | 31:01   | 7         | (9.1)  | 21              | (10.5) | 0.727          | -                      |
| A32   | 32:01   | 1         | (1.3)  | 1               | (0.5)  | 0.482          | -                      |
| A33   | 33:03   | 22        | (28.6) | 53              | (26.5) | 0.728          | -                      |
|       | 33:25   | 1         | (1.3)  | 0               | (0.0)  | 0.106          | -                      |
| A68   | 68:01   | 1         | (1.3)  | 0               | (0.0)  | 0.106          | -                      |

**Supplementary Table S3. Distribution of the HLA-B-type genes between the GB and control groups.**

| Group     | Alleles | GB (N=77) |        | Control (N=200) |        | P value | Odds ratio |
|-----------|---------|-----------|--------|-----------------|--------|---------|------------|
|           |         | n (%)     |        | n (%)           |        |         | (95% CI)   |
| BW4       | 13:01   | 5         | (6.5)  | 9               | (4.5)  | 0.497   | -          |
|           | 38:02   | 2         | (2.6)  | 7               | (3.5)  | 0.704   | -          |
|           | 44:03   | 14        | (18.2) | 31              | (15.5) | 0.588   | -          |
|           | 52:01   | 7         | (9.1)  | 9               | (4.5)  | 0.142   | -          |
|           | 58:01   | 11        | (14.3) | 21              | (10.5) | 0.377   | -          |
|           | 27:04   | 0         | (0.0)  | 1               | (0.5)  | 0.534   | -          |
|           | 51:02   | 1         | (1.3)  | 4               | (2.0)  | 0.694   | -          |
| BW4 (80I) | 24:02   | 28        | (36.4) | 75              | (37.5) | 0.861   | -          |
|           | 32:01   | 1         | (1.3)  | 1               | (0.5)  | 0.482   | -          |
|           | 51:01   | 8         | (10.4) | 37              | (18.5) | 0.101   | -          |
|           | 57:01   | 1         | (1.3)  | 2               | (1.0)  | 0.830   | -          |
| BW4 (80T) | 13:02   | 8         | (10.4) | 14              | (7.0)  | 0.350   | -          |
|           | 27:05   | 7         | (9.1)  | 15              | (7.5)  | 0.661   | -          |
|           | 37:01   | 5         | (6.5)  | 4               | (2.0)  | 0.059   | -          |
|           | 44:02   | 3         | (3.9)  | 7               | (3.5)  | 0.874   | -          |
| BW6       | 07:02   | 7         | (9.1)  | 18              | (9.0)  | 0.981   | -          |
|           | 08:01   | 1         | (1.3)  | 2               | (1.0)  | 0.830   | -          |
|           | 14:01   | 0         | (0.0)  | 8               | (4.0)  | 0.075   | -          |
|           | 15:01   | 20        | (26.0) | 34              | (17.0) | 0.091   | -          |
|           | 15:02   | 0         | (0.0)  | 1               | (0.5)  | 0.534   | -          |
|           | 15:07   | 0         | (0.0)  | 3               | (1.5)  | 0.280   | -          |
|           | 15:18   | 2         | (2.6)  | 8               | (4.0)  | 0.575   | -          |
|           | 27:05   | 7         | (9.1)  | 15              | (7.5)  | 0.661   | -          |
|           | 35:01   | 11        | (14.3) | 18              | (9.0)  | 0.198   | -          |
|           | 40:01   | 4         | (5.2)  | 13              | (6.5)  | 0.685   | -          |
|           | 46:01   | 5         | (6.5)  | 22              | (11.0) | 0.257   | -          |

|  |       |   |        |    |        |       |   |
|--|-------|---|--------|----|--------|-------|---|
|  | 51:01 | 8 | (10.4) | 37 | (18.5) | 0.101 | - |
|  | 54:01 | 5 | (6.5)  | 26 | (13.0) | 0.124 | - |
|  | 81:01 | 0 | (0.0)  | 1  | (0.5)  | 0.534 | - |
|  | 07:02 | 7 | (9.1)  | 18 | (9.0)  | 0.981 | - |
|  | 08:01 | 1 | (1.3)  | 2  | (1.0)  | 0.830 | - |
|  | 14:01 | 0 | (0.0)  | 8  | (4.0)  | 0.075 | - |

**Supplementary Table S4. Distribution of the HLA-C-type genes between the GB and control groups.**

| Group | Alleles | GB (N=77) |        | Control (N=200) |        | P value | Odds ratio       |
|-------|---------|-----------|--------|-----------------|--------|---------|------------------|
|       |         | n (%)     |        | n (%)           |        |         | (95% CI)         |
| C1    | 01:02   | 22        | (28.6) | 72              | (36.0) | 0.242   | -                |
|       | 01:03   | 0         | (0.0)  | 3               | (1.5)  | 0.563   | -                |
|       | 03:02   | 11        | (14.3) | 21              | (10.5) | 0.377   | -                |
|       | 03:03   | 14        | (18.2) | 36              | (18.0) | 0.972   | -                |
|       | 03:04   | 10        | (13.0) | 34              | (17.0) | 0.413   | -                |
|       | 07:01   | 1         | (1.3)  | 0               | (0.0)  | 0.106   | -                |
|       | 07:02   | 15        | (19.5) | 36              | (18.0) | 0.776   | -                |
|       | 07:04   | 2         | (2.6)  | 8               | (4.0)  | 0.575   | -                |
|       | 07:06   | 1         | (1.3)  | 8               | (4.0)  | 0.256   | -                |
|       | 08:01   | 4         | (5.2)  | 30              | (15.0) | 0.012   | 0.3 (0.1 – 0.9)  |
|       | 08:02   | 0         | (0.0)  | 8               | (4.0)  | 0.075   | -                |
|       | 08:03   | 0         | (0.0)  | 3               | (1.5)  | 0.280   | -                |
|       | 12:02   | 7         | (9.1)  | 10              | (5.0)  | 0.204   | -                |
|       | 12:03   | 1         | (1.3)  | 3               | (1.5)  | 0.900   | -                |
|       | 14:02   | 9         | (11.7) | 28              | (14.0) | 0.612   | -                |
|       | 14:03   | 11        | (14.3) | 24              | (12.0) | 0.608   | -                |
| C2    | 02:02   | 2         | (2.6)  | 4               | (2.0)  | 0.760   | -                |
|       | 04:01   | 16        | (20.8) | 22              | (11.0) | 0.034   | 2.1 (1.05 – 4.3) |
|       | 05:01   | 3         | (3.9)  | 7               | (3.5)  | 0.874   | -                |
|       | 06:02   | 12        | (15.6) | 19              | (9.5)  | 0.150   | -                |
|       | 15:02   | 3         | (3.9)  | 13              | (6.5)  | 0.405   | -                |
|       | 15:05   | 2         | (2.6)  | 2               | (1.0)  | 0.318   | -                |

Supplementary Figure S1. Distribution of KIR haplotypes and genotypes between GB and control groups.

[illegible]
